# Supplementary figures and images for: Seamless integration of CMOS microsensors into open microfluidic systems
Source: Royal Society of Chemistry journal article supplement (doi:10.1039/d4lc01000k), 2025-01-01

Isometric projected view:

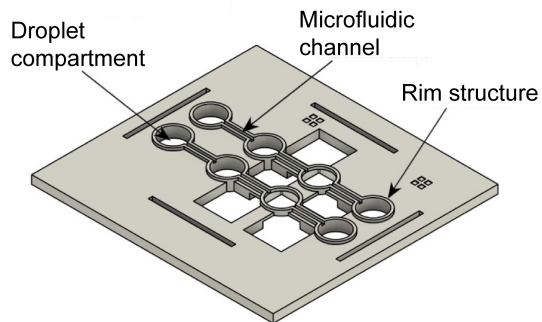

Top view:

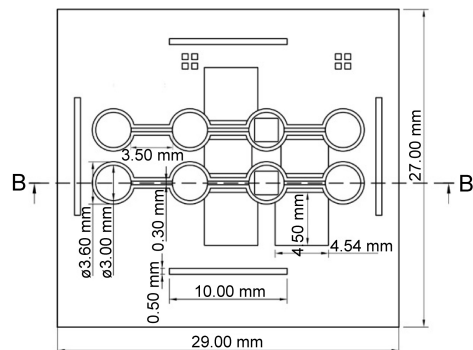

Isometric projected view of BB':

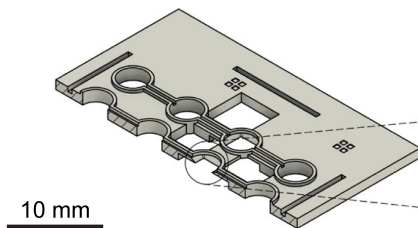

Side view of section BB':

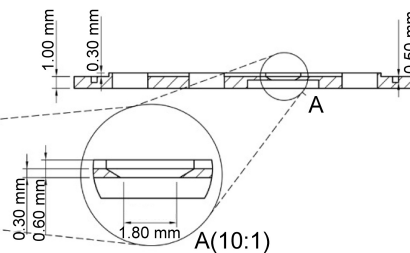

Supplement: d4lc01000k5.pdf [file d4lc01000k5.pdf]
